# Supplementary material for: The threonine degradation pathway of the Trypanosoma brucei procyclic form: the main carbon source for lipid biosynthesis is under metabolic control
Source: PubMed Central journal article supplement (PMC4034587; doi:10.1111/mmi.12351), 2013-08-25
Supplement: mmi0090-0114-sd1.pdf [file mmi0090-0114-sd1.pdf]

Figure S1

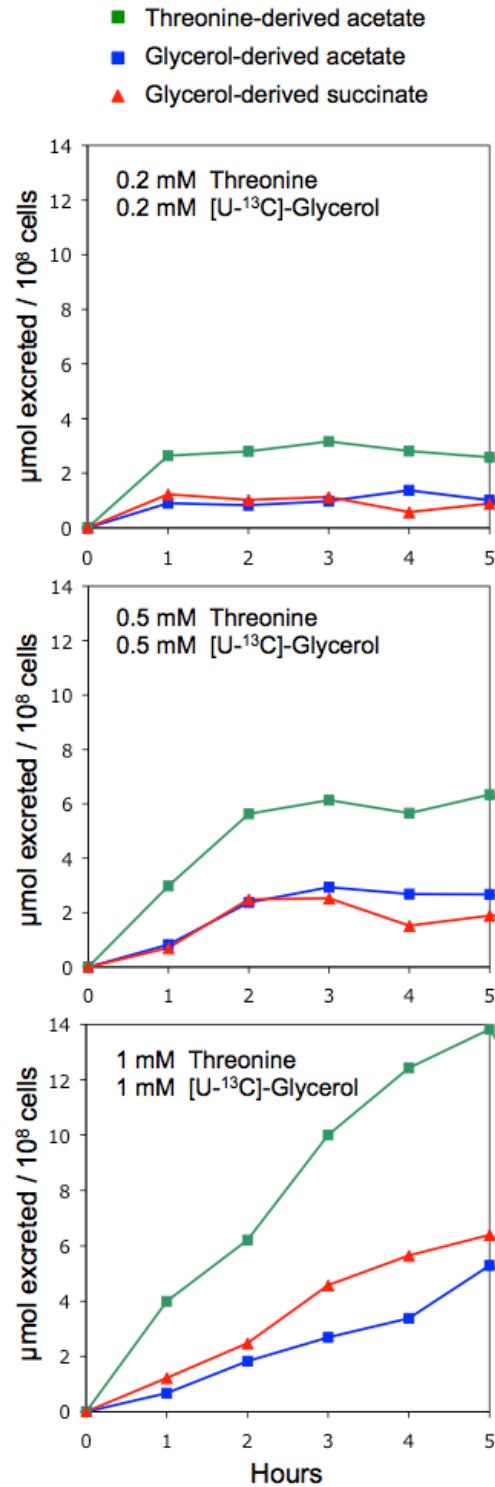

**Kinetic of acetate and succinate production from low amounts of threonine and glycerol.** The amounts of acetate and succinate produced by the wild type trypanosomes incubated in PBS containing 0.2, 0.5 or 1 mM of [U-<sup>13</sup>C]-glycerol and threonine were determined by <sup>1</sup>H-NMR every hour during 5 h. The initial rate of acetate production for threonine is in the same range regardless of the amounts of carbon sources.

Figure S2

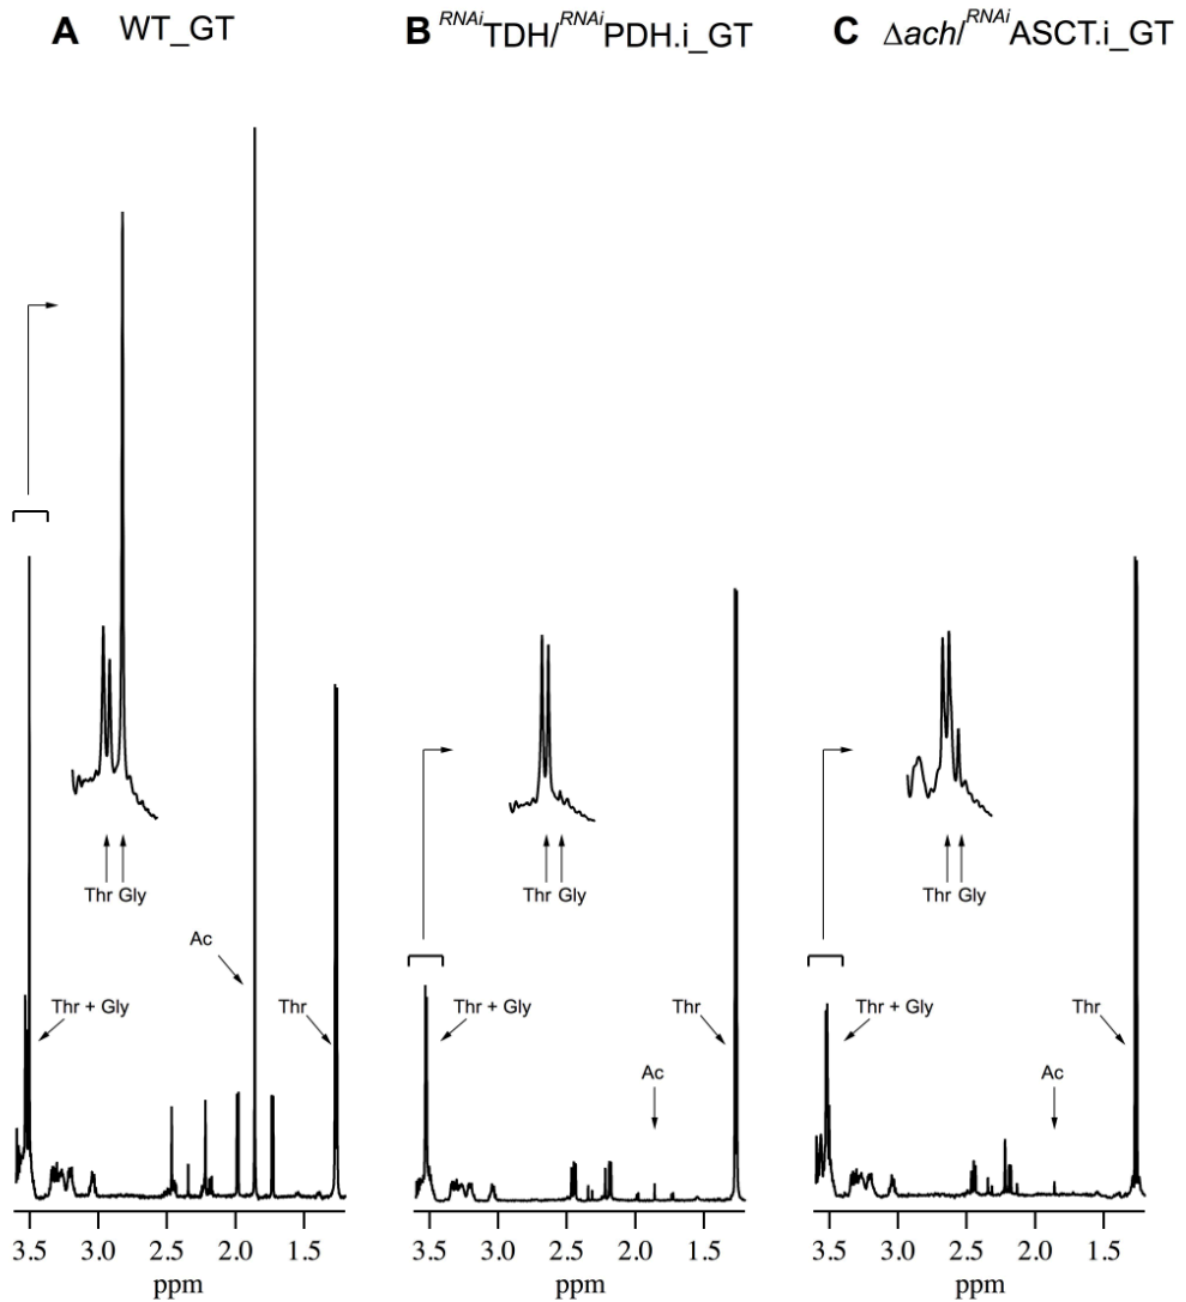

**Production of glycine from threonine.** Metabolic end-products (in particular acetate and glycine) excreted by the procyclic wild type cell line (A), the <sup>RNAi</sup>TDH/<sup>RNAi</sup>PDH.i (B) and  $\Delta$ ach/<sup>RNAi</sup>ASCT.i (C) mutant from D-[U-<sup>13</sup>C]-glucose and threonine was determined by <sup>1</sup>H-NMR. For more details see Fig. 2. A part of each spectrum ranging from 1.2 to 3.6 ppm is shown. A high resolution of the 3.5-3.6 ppm area is shown in the inset to separate the threonine doublet and the glycine singlet.

Figure S3

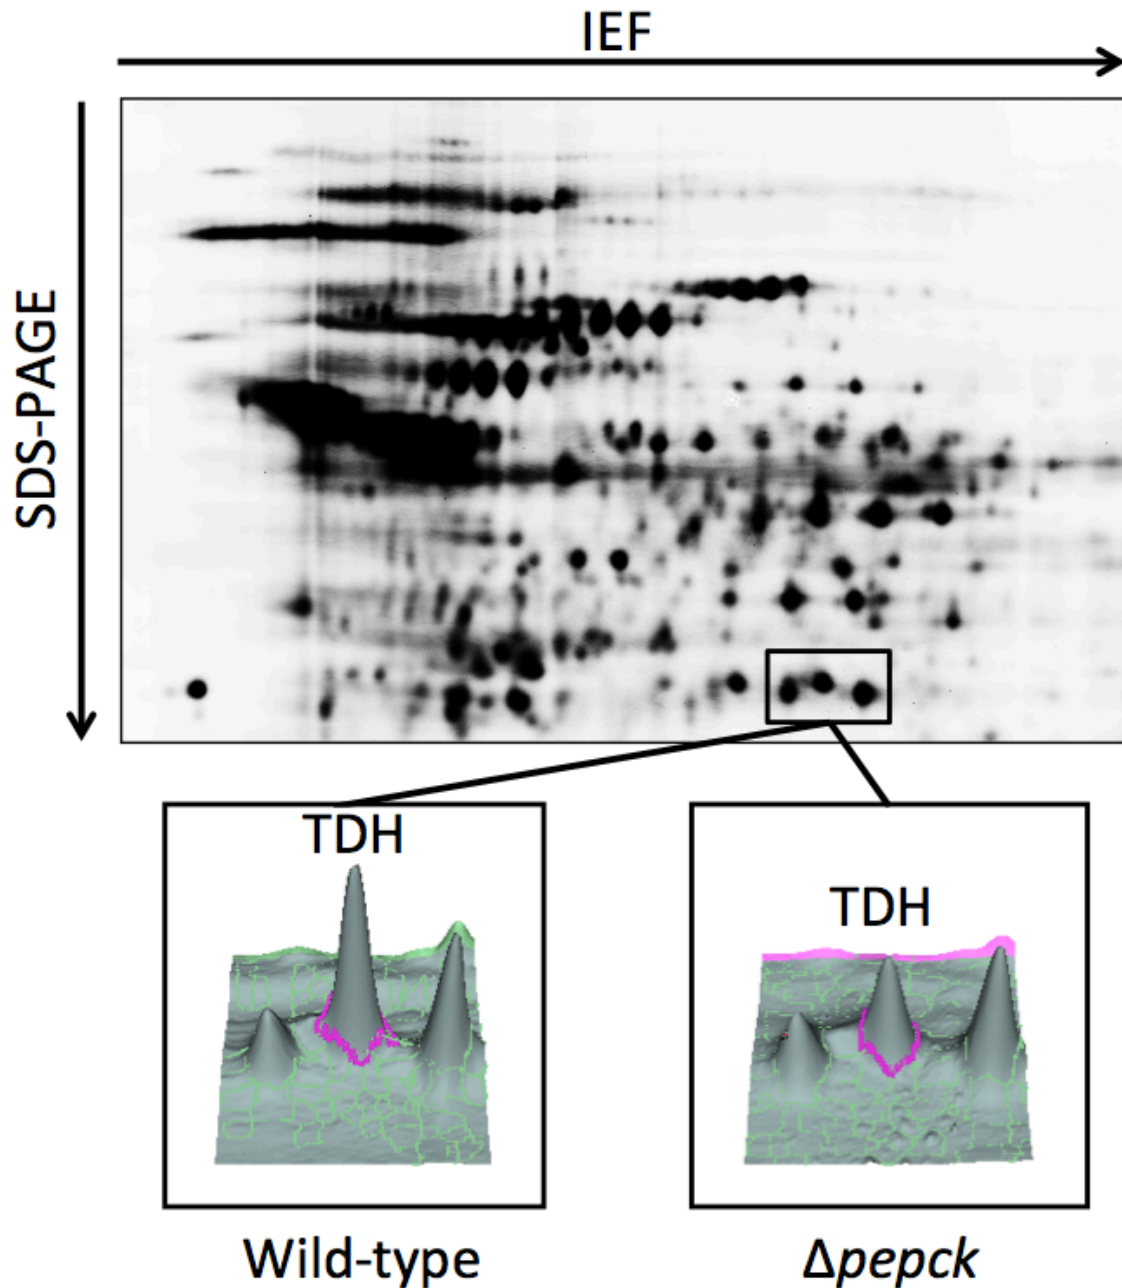

**Difference gel electrophoresis (DIGE) analysis of wild type and  $\Delta pepck$  procyclic form *T. brucei*.** Four biological replicates of each line were compared by multiplex DIGE analysis, utilizing a pooled internal standard. A protein spot that was found to be down regulated in the  $\Delta pepck$  by 1.5 fold ( $p=4.0 \text{ e-}6$ ;  $n=4$ ) was identified as threonine dehydrogenase (TDH). Fold change indicates average change in standardized abundance. A representative 2D gel spot map is shown, with an inset box showing the location of the spot identified as TDH. The difference in spot intensity between wild type and  $\Delta pepck$  is illustrated by 3 dimensional representations of spot volume.

Figure S4

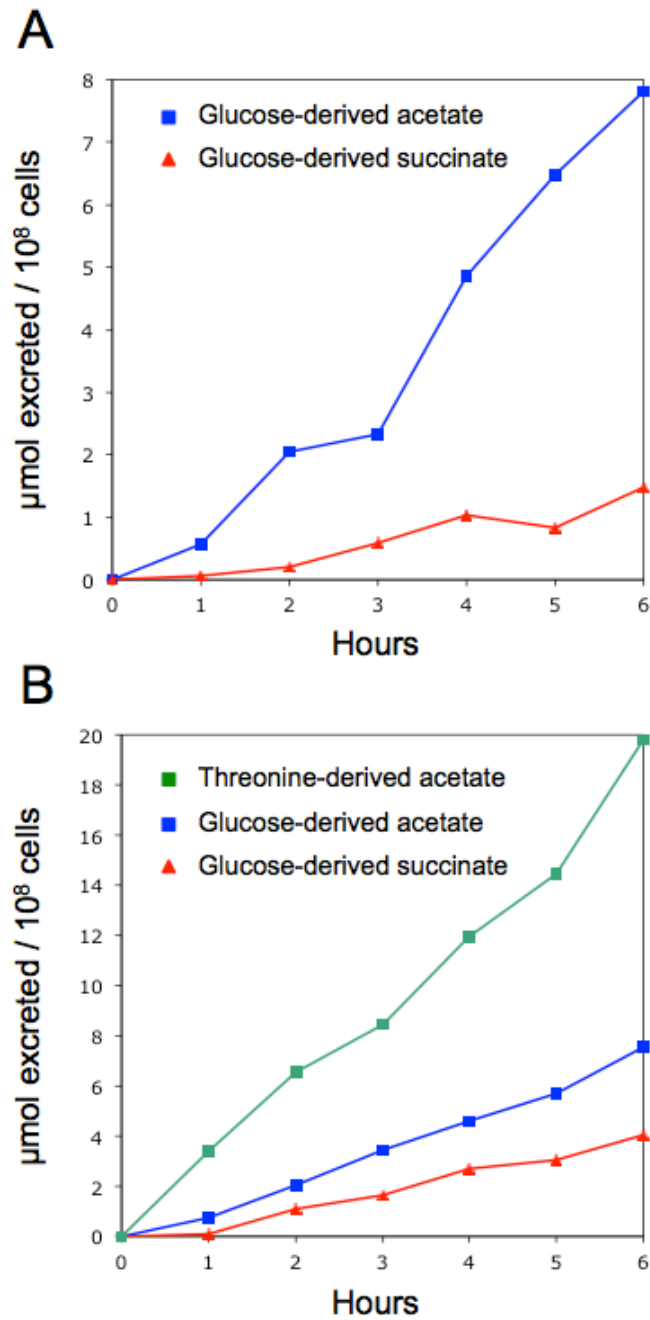

**Kinetic of acetate and succinate production.** The amounts of acetate and succinate produced by the wild type trypanosomes incubated in PBS containing [U- $^{13}\text{C}$ ]-glucose (A) or [U- $^{13}\text{C}$ ]-glucose and threonine (B) were determined by  $^1\text{H-NMR}$  every hour during 6 h. Production of the excreted end product is linear during the whole experiment.
